# Supplementary material
Source: ML conference proceedings conference paper supplement (https://www.ecva.net/papers/eccv_2024/papers_ECCV/html/5143_ECCV_2024_paper.php)
Supplement: Supplementary file 1 [file 05143-supp.pdf]

## A Appendix

### A.1 Comprehensive Text Reading Datasets (Worms) Composition

The following tables provide detailed statistics of the Worms training set. The dataset includes diverse subsets to cover various text reading tasks comprehensively.

**Table 11:** The statistics of the training set of our proposed comprehensive text reading datasets (Worms). Dataset marked with an \* suggests that the annotations are inexact, potentially representing pseudo-labels generated through model-based pre-annotation. In the "Granularity" column, the presence of a blue star  $\star$  signifies that the original dataset lacked annotations, which we have supplemented. Synth-arxiv with  $\dagger$  means synthetic formula data generated by ourselves.

| Dataset                  | Subset   | Category                 | Writing Type | Granularity<br>word line | Number      |      |
|--------------------------|----------|--------------------------|--------------|--------------------------|-------------|------|
| ICDAR2013 [28]           | train    | Natural scene full image | printed      | ✓ $\star$                | 229         |      |
| ICDAR2015 [27]           | train    |                          |              | ✓ $\star$                | 1K          |      |
| CTW1500 [44]             | train    |                          |              | $\star$ ✓                | 1K          |      |
| TotalText [12]           | train    |                          |              | ✓ $\star$                | 1.3K        |      |
| HierText [50]            | trainval |                          |              | ✓ ✓                      | 10K         |      |
| TextOCR [67]             | train    |                          |              | ✓ $\star$                | 25K         |      |
| Open Images V5 Text [32] | trainval |                          |              | ✓ $\times$               | 208K        |      |
| Uber-Text [88]           | trainval |                          |              | $\times$ ✓               | 83K         |      |
| COCO-Text [70]           | trainval |                          |              | ✓ $\times$               | 54K         |      |
| Curved SynthText [46]    | train    |                          |              | ✓ $\times$               | 149K        |      |
| MLT2017 [55]             | train    |                          |              | ✓ $\times$               | 10K         |      |
| LAION-OCR [62]*          | train    |                          |              | ✓ $\times$               | 2.5M        |      |
| PubLayNet [89]*          | trainval |                          |              | Document full image      | ✓ ✓         | 352K |
| MJSynth [25]             | train    |                          |              | Cropped text             | handwritten | none |
| SynthText [20]           | train    | 7.3M                     |              |                          |             |      |
| SynthAdd <sup>4</sup>    | train    | 1.2M                     |              |                          |             |      |
| Union14M-L [26]          | train    | 4.1M                     |              |                          |             |      |
| OOV [18]                 | train    | 4.4M                     |              |                          |             |      |
| LAION-OCR [62]*          | train    | 11.2M                    |              |                          |             |      |
| IAM [53]                 | trainval | 60K                      |              |                          |             |      |
| CVL [31]                 | train    | 86K                      |              |                          |             |      |
| RIMES [19]               | trainval | 52K                      |              |                          |             |      |
| CROHME [77]              | trainval | 11K                      |              |                          |             |      |
| HME100K [86]             | train    | Cropped formula          | none         | 75K                      |             |      |
| LatexOCR <sup>5</sup>    | trainval |                          |              | 165K                     |             |      |
| Synth-arxiv $\dagger$    | train    |                          |              | 10.2M                    |             |      |
| Total                    | -        | -                        | -            | -                        | 51.1M       |      |

<sup>4</sup> From <https://mmocr.readthedocs.io/en/v0.6.3/datasets/recog.html#synthadd>.

<sup>5</sup> Results are from: <https://github.com/lukas-blecher/LaTeX-OCR>
